# Supplementary material
Source: PubMed Central journal article supplement (PMC6815104)
Supplement: NIHMS1539321-supplement-1.pdf [file NIHMS1539321-supplement-1.pdf]

## Supplementary Figure 1

| Disease | Cell line | Mutated protein | Label in Figure 1: | Affected Pathway     | GGRd |
|---------|-----------|-----------------|--------------------|----------------------|------|
| None    | BJ1       | None            | BJ1                | None                 | No   |
| CS      | GM08156   | CSB             | CSB1               | TCR                  | No   |
| CS      | GM00739   | CSA             | CSA                | TCR                  | No   |
| CS      | GM01629   | CSB             | CSB2               | TCR                  | No   |
| TTD     | GM15752   | XPD             | TTD                | TFIIH, transcription | No   |
| XPV     | GM03053   | POL Eta         | XPV1               | TLS                  | No   |
| XPV     | GM02359   | POL Eta         | XPV2               | TLS                  | No   |
| TTD     | GM15753   | XPD             | TTD2               | TFIIH, transcription | No   |
| XP      | GM14930   | XPG             | XPG                | GGR and TCR          | Yes  |
| XP      | GM01389   | DDB2            | XPE                | GGR                  | Yes  |
| XP      | GM21071   | XPB             | XPB                | GGR and TCR          | Yes  |
| XP      | GM01630   | XPA             | XPA                | GGR and TCR          | Yes  |
| XP      | GM08207   | XPD             | XPD1               | GGR and TCR          | Yes  |
| XP      | GM03248   | XPD             | XPD2               | GGR and TCR          | Yes  |
| XP      | GM08437   | XPF             | XPF                | GGR and TCR          | Yes  |
| XP      | GM14867   | XPC             | XPC                | GGR                  | Yes  |

### Supplementary Figure 1: XP, CS, and TTD cell lines

Immortalized fibroblast cell lines from patients with Cockayne syndrome (CS), trichothiodystrophy (TTD), or xeroderma pigmentosum (XP) were subjected to NER profiling with the DDB2 proteo-probe assay. Each cell line has bi-allelic loss or mutation of a specific gene in the NER pathway; however, only patients with loss of a gene in the global genome repair (GGR) sub-pathway of NER exhibit a DNA repair deficient phenotype in the DDB2 proteo-probe assay. Loss of a gene involved in transcription (TFIIH), translesion synthesis (TLS), or transcription-coupled repair (TCR) do not exhibit a NER deficient phenotype in the DDB2 proteo-probe assay. BJ1 is a normal human fibroblast cell line without any NER defects. TCR: transcription-coupled repair; GGR: global genome repair; TFIIH: transcription factor IIH; TLS: trans-lesion synthesis; GGRd: deficient in global-genome sub-pathway (or the common/shared nucleotide excision repair pathway).

## Supplementary Figure 2

| Cell line      | ER | PR | HER2 |
|----------------|----|----|------|
| AU565          | -  | -  | +    |
| BT20           | -  | -  |      |
| BT474          | +  | +  | +    |
| BT549          | -  | -  |      |
| CAMA-1         | +  | -  |      |
| HCC38          | -  | -  |      |
| HCC70          | -  | -  |      |
| HCC202         | -  | -  | +    |
| HCC1143        | -  | -  |      |
| HCC1187        | -  | -  |      |
| HCC1395*       | -  | -  |      |
| HCC1419*       | -  | -  | +    |
| HCC1428        | +  | +  |      |
| HCC1500        | -  | -  |      |
| HCC1569        | -  | -  | +    |
| HCC1806*       | -  | -  |      |
| HCC1954        | -  | -  | +    |
| Hs578T         | -  | -  |      |
| MCF7           | +  | +  |      |
| MDA-Kb2**      | -  | -  |      |
| MDA-MB-157     | -  | -  |      |
| MDA-MB-175-VII | +  | -  |      |
| MDA-MB-231     | -  | -  |      |
| MDA-MB-361     | +  | -  | +    |
| MDA-MB-436     | -  | -  |      |
| MDA-MB-453     | -  | -  |      |
| MDA-MB-468     | -  | -  |      |
| SK-BR-3        | -  | -  | +    |
| SUM149         | -  | -  |      |
| SUM1315        | -  | -  |      |
| T47D           | +  | +  |      |
| UACC-812       | +  | -  | +    |
| UACC-893*      | -  | -  | +    |
| ZR-75-1        | +  | -  |      |
| ZR-75-30       | +  | -  | +    |

### Supplementary Figure 2. Breast cancer cell lines

For each breast cancer cell line in this study, the ER, PR, and HER2 status is shown based on data from Neve et al[32]. Cell lines not included in the Neve et al study are denoted with asterisks; for these lines, receptor status was obtained from the ATCC website. ER, PR, and HER2 status for MD-Kb2 were not available; therefore, data from MDA-MB-453 (the parental line for MD-Kb2) are shown.

### Supplementary Figure 3

| Gene   | Protein      | Pathway |
|--------|--------------|---------|
| DDB1   | DDB1 / XPE   | GGR     |
| DDB2   | DDB2 / XPE   |         |
| XPC    | XPC          |         |
| ERCC6  | CSB          | TCR     |
| ERCC8  | CSA          |         |
| XAB2   | XAB2         | Both    |
| CCNH   | Cyclin H     |         |
| CDK7   | Cdk7         |         |
| CETN2  | Centrin-2    |         |
| CUL4A  | Culin 4A     |         |
| ERCC1  | ERCC1        |         |
| ERCC2  | ERCC2 / XPD  |         |
| ERCC3  | ERCC3 / XPB  |         |
| ERCC4  | ERCC4 / XPF  |         |
| ERCC5  | ERCC5 / XPG  |         |
| GTF2H1 | GTF2H1       |         |
| GTF2H2 | GTF2H2       |         |
| GTF2H3 | GTF2H3       |         |
| GTF2H4 | GTF2H4       |         |
| GTF2H5 | GTF2H5       |         |
| MMS19  | MMS19        |         |
| MNAT1  | MNAT1        |         |
| NEDD8  | NEDD8        |         |
| RAD23A | RAD23A       |         |
| RAD23B | RAD23B       |         |
| RBX1   | Roc1         |         |
| RNF111 | RNF111       |         |
| RPA1   | RPA1 / RPA70 |         |
| RPA2   | RPA2 / RPA32 |         |
| RPA3   | RPA3         |         |
| UBE2I  | Ubc9         |         |
| USP7   | USP7         |         |
| XPA    | XPA          |         |

### Supplementary Figure 3: Nucleotide excision repair (NER) gene set list.

GGR, global genome repair sub-pathway; TCR, transcription-coupled repair sub-pathway.

## Supplementary Figure 4

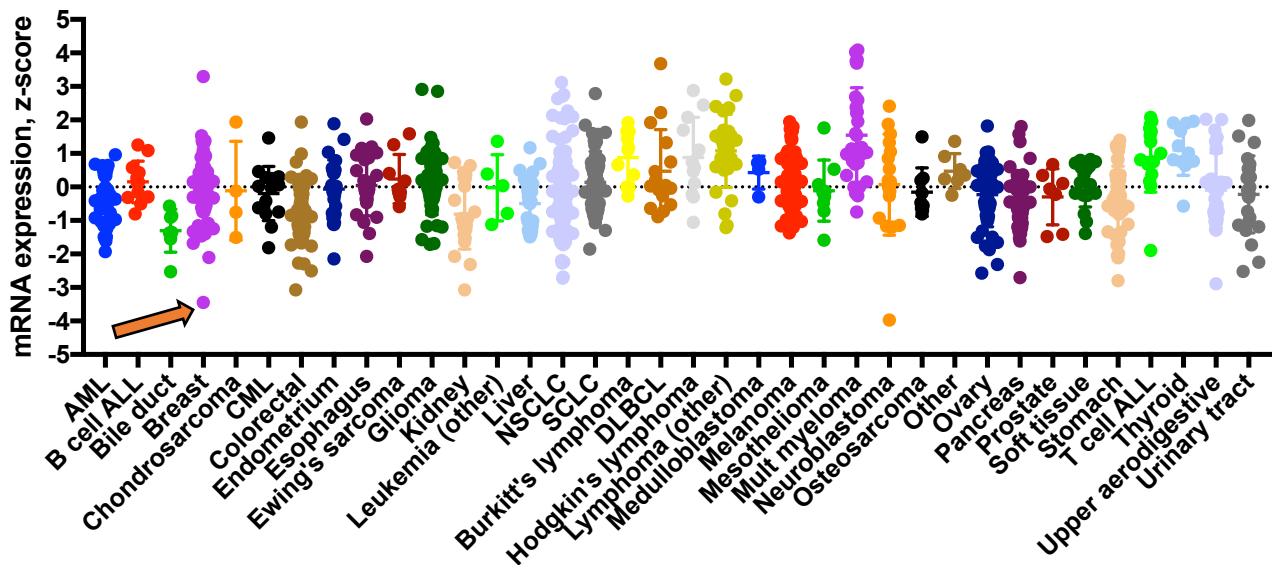

**Supplementary Figure 4: *ERCC4* mRNA expression levels across cell lines from the Cancer Cell Line Encyclopedia (CCLE).**

MDA-MB-468 (denoted by orange arrow) has the lowest *ERCC4* expression across breast cancer cell lines and the second lowest *ERCC4* expression across all cancer cell lines. Data was downloaded from the CCLE website (<https://portals.broadinstitute.org/ccle>) and plotted using Prism (GraphPad).

# Supplementary Figure 5

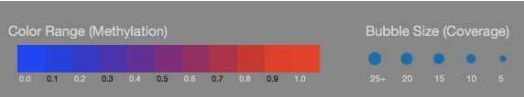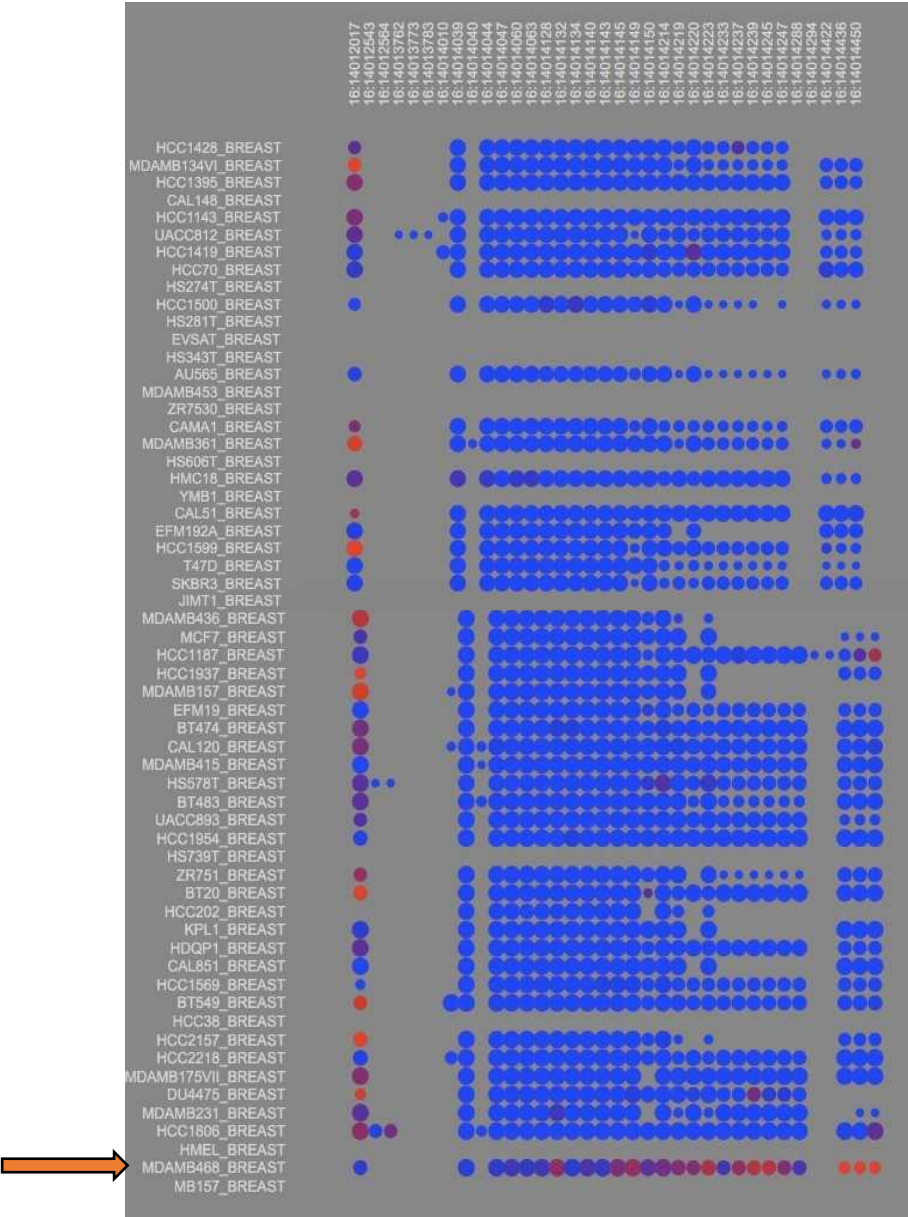

Supplementary Figure 5: CpG methylation of the *ERCC4* gene.

*ERCC4* gene methylation from all available breast cancer cell lines in the Cancer Cell Line Encyclopedia (CCLE). MDA-MB-468 (denoted by orange arrow) has the highest levels of *ERCC4* methylation among all lines.

## Supplementary Figure 6

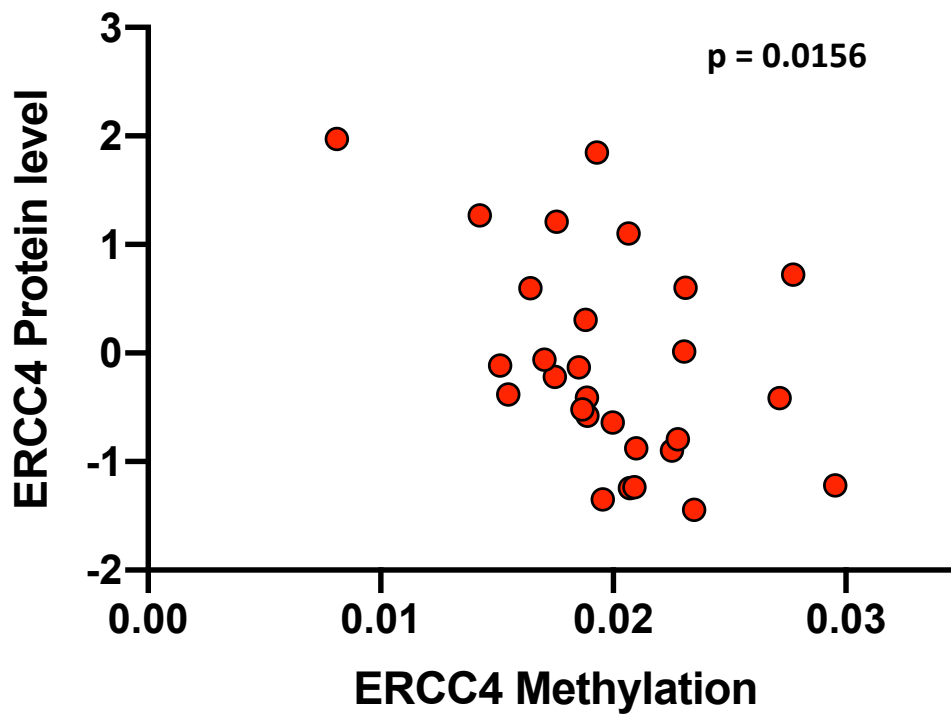

**Supplementary Figure 6: Correlation between *ERCC4* gene methylation and XPF protein levels.**

Data from the breast cancer TCGA cohort were downloaded via the cBioPortal interface ([www.cbioportal.org](http://www.cbioportal.org)) and figures were generated using Prism (GraphPad).
